# Supplementary material for: Osteopathic Manipulative Treatment Regulates Autonomic Markers in Preterm Infants: A Randomized Clinical Trial
Source: MDPI journal article supplement (doi:10.3390/healthcare10050813), 2022-04-27
Supplement: s1 [file s1]

## Supplementary materials

**Table S1.** Tukey post-hoc tests regarding LF relative power (%) computed through FFT

| Group Comparison      | LF power difference (95% IC) | P-value |
|-----------------------|------------------------------|---------|
| Static T0 – OMT T0    | 2.763 (-4.468, 9.993)        | 0.885   |
| Static T1 – OMT T1    | 7.163 (-0.067, 14.394)       | 0.054   |
| Static T2 – OMT T2    | 2.050 (-5.221, 9.320)        | 0.967   |
| Static T1 – Static T0 | 3.787 (-2.960, 10.533)       | 0.597   |
| Static T2 – Static T1 | -2.798 (-9.587, 3.991)       | 0.848   |
| Static T2 – Static T0 | 0.989 (-5.800, 7.778)        | 0.998   |
| OMT T1 – OMT T0       | -0.614 (-7.085, 5.857)       | 1.000   |
| OMT T2 – OMT T1       | 2.316 (-4.155, 8.787)        | 0.911   |
| OMT T2 – OMT T0       | 1.702 (-4.769, 8.173)        | 0.975   |

Legend: FFT, Fast-Fourier transformation; LF, low frequency band of heart rate variability; OMT, osteopathic manipulative treatment; Static, static touch; T0, baseline; T1, touch period; T2, post-touch period.

**Table S2.** Tukey post-hoc tests regarding HF relative power (%) computed through FFT

| Group Comparison      | HF difference (95% IC) | P-value |
|-----------------------|------------------------|---------|
| Static T0 – OMT T0    | 0.051 (-2.156, 2.257)  | 1.000   |
| Static T1 – OMT T1    | 0.882 (-1.325, 3.089)  | 0.862   |
| Static T2 – OMT T2    | 0.619 (-1.598, 2.836)  | 0.968   |
| Static T1 – Static T0 | 1.228 (-0.621, 3.077)  | 0.403   |
| Static T2 – Static T1 | -0.153 (-2.014, 1.709) | 1.000   |
| Static T2 – Static T0 | 1.076 (-0.786, 2.937)  | 0.563   |
| OMT T1 – OMT T0       | 0.397 (-1.377, 2.170)  | 0.988   |
| OMT T2 – OMT T1       | 0.110 (-1.663, 1.884)  | 1.000   |
| OMT T2 – OMT T0       | 0.507 (-1.266, 2.280)  | 0.964   |

Legend: FFT, Fast-Fourier transformation; HF, high frequency of heart rate variability; OMT, osteopathic manipulative treatment; Static, static touch; T0, baseline; T1, touch period; T2, post-touch period.



**Table S3.** Tukey post-hoc tests regarding ApEn

| Group Comparison      | ApEn difference (95% IC) | P-value |
|-----------------------|--------------------------|---------|
| Static T0 – OMT T0    | 0.006 (-0.067, 0.079)    | 1.000   |
| Static T1 – OMT T1    | -0.040 (-0.113, 0.033)   | 0.617   |
| Static T2 – OMT T2    | -0.078 (-0.151, -0.004)  | 0.032   |
| Static T1 – Static T0 | -0.015 (-0.076, 0.045)   | 0.979   |
| Static T2 – Static T1 | -0.029 (-0.090, 0.032)   | 0.745   |
| Static T2 – Static T0 | -0.045 (-0.106, 0.017)   | 0.295   |
| OMT T1 – OMT T0       | 0.030 (-0.028, 0.089)    | 0.668   |
| OMT T2 – OMT T1       | 0.008 (-0.050, 0.066)    | 0.999   |
| OMT T2 – OMT T0       | 0.039 (-0.020, 0.097)    | 0.407   |

Legend: ApEn, approximate entropy; OMT, osteopathic manipulative treatment; Static, static touch; T0, baseline; T1, touch period; T2, post-touch period.

**Table S4.** Tukey post-hoc tests regarding SampEn

| Group Comparison      | SampEn difference (95% IC) | P-value |
|-----------------------|----------------------------|---------|
| Static T0 – OMT T0    | -0.007 (-0.094, 0.080)     | 1.000   |
| Static T1 – OMT T1    | -0.020 (-0.107, 0.067)     | 0.986   |
| Static T2 – OMT T2    | -0.058 (-0.145, 0.029)     | 0.397   |
| Static T1 – Static T0 | -0.023 (-0.093, 0.046)     | 0.931   |
| Static T2 – Static T1 | -0.010 (-0.080, 0.060)     | 0.999   |
| Static T2 – Static T0 | -0.033 (-0.103, 0.037)     | 0.755   |
| OMT T1 – OMT T0       | -0.010 (-0.077, 0.057)     | 0.998   |
| OMT T2 – OMT T1       | 0.028 (-0.039, 0.095)      | 0.833   |
| OMT T2 – OMT T0       | 0.018 (-0.049, 0.085)      | 0.971   |

Legend: OMT, osteopathic manipulative treatment; SampEn, Sample entropy; Static, static touch; T0, baseline; T1, touch period; T2, post-touch period.



**Table S5.** Tukey post-hoc tests regarding DFA1

| Group Comparison      | DFA1 difference (95% IC) | P-value |
|-----------------------|--------------------------|---------|
| Static T0 – OMT T0    | -0.012 (-0.123, 0.098)   | 1.000   |
| Static T1 – OMT T1    | 0.036 (-0.075, 0.146)    | 0.943   |
| Static T2 – OMT T2    | 0.083 (-0.028, 0.195)    | 0.272   |
| Static T1 – Static T0 | 0.028 (-0.084, 0.139)    | 0.981   |
| Static T2 – Static T1 | 0.014 (-0.098, 0.126)    | 0.999   |
| Static T2 – Static T0 | 0.042 (-0.070, 0.153)    | 0.897   |
| OMT T1 – OMT T0       | -0.020 (-0.127, 0.086)   | 0.994   |
| OMT T2 – OMT T1       | -0.034 (-0.140, 0.073)   | 0.947   |
| OMT T2 – OMT T0       | -0.054 (-0.161, 0.053)   | 0.701   |

Legend: DFA1, detrended fluctuation analysis 1; OMT, osteopathic manipulative treatment; Static, static touch; T0, baseline; T1, touch period; T2, post-touch period.



**Table S6.** Power analysis through Monte Carlo simulation regarding the primary outcome RMSSD. The power  $\beta$  was calculated for the effect of the group variable in the ANOVA, and for the differences between OMT and Static Touch in the Touch and Post-Touch periods in the Tukey post-hoc tests

| N per group | ANOVA Group effect<br>$\beta$ | OMT T1 – Static T1<br>$\beta$ | OMT T2 – Static T2<br>$\beta$ |
|-------------|-------------------------------|-------------------------------|-------------------------------|
| 50          | 0.33                          | 0.22                          | 0.06                          |
| 100         | 0.54                          | 0.45                          | 0.14                          |
| 150         | 0.79                          | 0.69                          | 0.29                          |
| 200         | 0.86                          | 0.88                          | 0.35                          |
| 250         | 0.91                          | 0.94                          | 0.44                          |
| 300         | 0.97                          | 0.97                          | 0.50                          |
| 350         | 0.99                          | 1.00                          | 0.65                          |
| 400         | 1.00                          | 1.00                          | 0.77                          |
| 450         | 1.00                          | 1.00                          | 0.78                          |
| 500         | 1.00                          | 1.00                          | 0.82                          |

Legend: ANOVA, analysis of variance; OMT, osteopathic manipulative treatment; RMSSD, root mean square of consecutive RR interval differences; Static, static touch; T1, touch period; T2, post-touch period.
